# Supplementary material for: Identification of a Sixteen-gene Prognostic Biomarker for Lung Adenocarcinoma Using a Machine Learning Method
Source: PubMed Central journal article supplement (PMC6959071; doi:10.7150/jca.34585), 2020-01-01
Supplement: jcav11p1288s1.pdf [file jcav11p1288s1.pdf]

### **Figure Legend**

**Figure S1:** Validation of the prognosis-related key genes in the GSE11969 cohort. **A)** The KM survival curve was generated in the GSE11969 cohort by the Cox model and RNA-Seq data. Patients of the GSE11969 cohort were divided into high- and low-risk groups based on the 50th percentile of risk score. **B)** The KM survival curve was generated in the GSE11969 cohort by the Cox model and clinically-integrated RNA-Seq data. Patients of the GSE11969 cohort were divided into high- and low-risk groups based on the 50th percentile of risk score. **C)** The KM survival curve was generated in the GSE11969 cohort by the RSF model and RNA-Seq data. Patients of the GSE11969 cohort were divided into high- and low-risk groups based on the 50th percentile of risk score. **D)** The KM survival curve was generated in the GSE11969 cohort by the RSF model and clinically-integrated RNA-Seq data. Patients of the GSE11969 cohort were divided into high- and low-risk groups based on the 50th percentile of risk score.

Figure S1

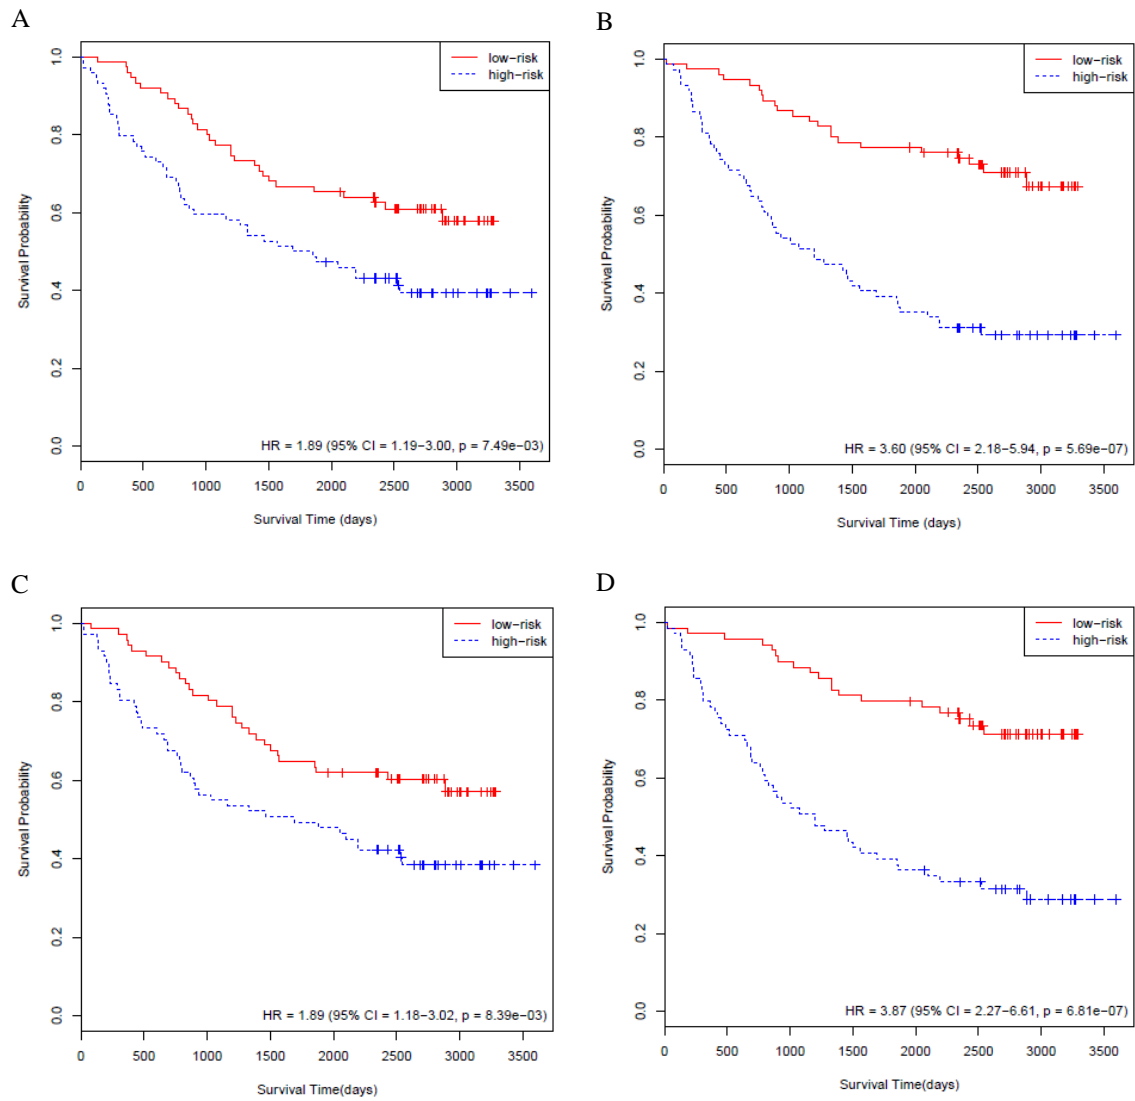

**Table S1: Cox survival analysis of the TCGA cohort I**

| Factor                               | Univariate                             |          | Multivariable          |          |
|--------------------------------------|----------------------------------------|----------|------------------------|----------|
|                                      | HR <sup>a</sup> (95% CI <sup>b</sup> ) | <i>p</i> | HR(95% CI)             | <i>p</i> |
| age(>65.5 <sup>c</sup> vs<br><=65.5) | 1.21<br>(0.84 to 1.73)                 | 0.31     | 1.19<br>(0.82 to 1.73) | 0.37     |
| gender(female<br>vs male)            | 0.72<br>(0.50 to 1.03)                 | 0.07     | 0.90<br>(0.62 to 1.32) | 0.60     |
| stage                                | 1.78<br>(1.50 to 2.11)                 | 3.95e-11 | 1.48<br>(1.15 to 1.90) | 2.23e-03 |
| risk score<br>(high vs low)          | 3.14<br>(2.11 to 4.69)                 | 2.04e-08 | 1.74<br>(0.99 to 3.08) | 0.06     |

<sup>a</sup>HR = hazard ratio;

<sup>b</sup>CI = confidence interval;

<sup>c</sup>65.5 = median age of patients with LUAD in the TCGA cohort I.

**Table S2: Prognosis-related key genes screening by the Cox model and RNA-Seq data**

| <b>nloglik</b> | <b>AIC</b> | <b>gene symbol</b> | <b>regression coefficients</b> |
|----------------|------------|--------------------|--------------------------------|
| 567.03         | 1136.07*   | LINC00683          | -0.14113                       |
| 557.79         | 1119.57*   | LOC100996288       | 0.08658                        |
| 551.98         | 1109.97*   | ARF3               | -5.70600                       |
| 545.68         | 1099.37*   | NTSR1              | -6.70716                       |
| 543.65         | 1097.31*   | FAM76A             | 0.16293                        |
| 541.91         | 1095.82*   | SULT2B1            | 1.39343                        |
| 537.45         | 1088.89*   | AHSG               | 0.58412                        |
| 534.03         | 1084.06*   | PITX3              | 0.12057                        |
| 533.07         | 1084.14*   | LINC01843          | -0.49704                       |
| 533.06         | 1086.12*   | NKX2.1             | -0.43686                       |
| 533.03         | 1088.07*   | MTURN              | -0.17840                       |
| 532.54         | 1089.08*   | ZNF710.AS1         | 0.08927                        |
| 527.17         | 1080.35*   | ANGPTL4            | 0.30854                        |

**Table S3: Prognosis-related key genes screening by the Cox model and clinically-integrated RNA-Seq data**

| <b>nloglik</b> | <b>AIC</b> | <b>gene symbol</b> | <b>regression coefficients</b> |
|----------------|------------|--------------------|--------------------------------|
| 546.32         | 1096.65*   | LINC01843          | -0.453                         |
| 542.39         | 1090.78*   | ZNF710.AS1         | 0.0749                         |
| 539.98         | 1087.95*   | AHSG               | 0.445                          |
| 536.72         | 1083.44*   | NTSR1              | -4.38                          |
| 533.49         | 1078.97*   | PITX3              | -0.0414                        |
| 530.32         | 1074.63*   | LINC00908          | 0.957                          |
| 527.57         | 1071.14*   | STAP1              | 0.291                          |
| 527.38         | 1072.77*   | FCRL1              | 120                            |
| 526.30         | 1072.61*   | SULT2B1            | 3.22                           |
| 525.15         | 1072.29*   | MS4A1              | -31.0                          |
| 522.52         | 1069.05*   | ARF3               | -6.70                          |
| 520.47         | 1066.94*   | LOC100996288       | 0.0618                         |
| 517.59         | 1063.18*   | ANGPTL4            | 0.333                          |

**Table S4: Prognosis-related key genes screening by the RSF model and RNA-Seq data**

| <b>nloglik</b> | <b>AIC</b> | <b>gene symbol</b> | <b>regression coefficients</b> |
|----------------|------------|--------------------|--------------------------------|
| 565.65         | 1133.30*   | LINC00908          | -0.0268                        |
| 559.83         | 1123.66*   | CRCT1              | 0.1390                         |
| 552.81         | 1111.61*   | ARF3               | -0.4191                        |
| 549.67         | 1107.33*   | ZNF710.AS1         | -0.0848                        |
| 548.97         | 1107.93*   | BAIAP2L2           | -0.2632                        |
| 542.15         | 1096.30*   | ANGPTL4            | 0.2133                         |
| 540.87         | 1095.75*   | MAFK               | 0.0785                         |
| 540.66         | 1097.33*   | C1orf106           | 0.5986                         |
| 535.43         | 1088.86*   | PITX3              | -0.1456                        |
| 534.48         | 1088.96*   | KRT18              | -0.0980                        |
| 532.04         | 1086.08*   | GABRA2             | -0.3414                        |
| 531.40         | 1086.80*   | SLC2A1             | 0.4923                         |
| 529.68         | 1085.36*   | LOC100996732       | 0.3154                         |
| 528.04         | 1084.07*   | FAM117A            | -0.0862                        |
| 525.98         | 1081.96*   | CNNM1              | -2.4091                        |

**Table S5: Prognosis-related key genes screening by the RSF model and clinically-integrated RNA-Seq data**

| <b>nloglik</b> | <b>AIC</b> | <b>gene symbol</b> | <b>regression coefficients</b> |
|----------------|------------|--------------------|--------------------------------|
| 548.77         | 1101.54*   | LINC00908          | -0.156651                      |
| 543.01         | 1092.02*   | PITX3              | -0.105483                      |
| 539.34         | 1086.68*   | GJB3               | 0.482751                       |
| 537.21         | 1084.43*   | CRCT1              | 0.540022                       |
| 535.83         | 1083.65*   | MELTF              | 0.243086                       |
| 533.19         | 1080.39*   | BAIAP2L2           | -0.128905                      |
| 530.44         | 1076.87*   | RHOV               | -8.397672                      |
| 527.78         | 1073.55*   | GABRA2             | -1.585957                      |
| 526.12         | 1072.24*   | ARF3               | -0.657799                      |
| 524.48         | 1070.96*   | TRIM7              | -0.047925                      |
| 522.88         | 1069.76*   | KRT18              | -0.005595                      |
| 521.29         | 1068.58*   | ZNF710.AS1         | -0.513451                      |
| 517.79         | 1063.57*   | LOC105370802       | -0.101560                      |
| 517.26         | 1064.52*   | LOC100996732       | 0.263032                       |
| 517.09         | 1066.19*   | SFTPB              | 1.604695                       |
| 513.51         | 1061.01*   | DKK1               | -0.137363                      |

**Table S6: Parameter setting of the forward selection model**

| <b>model</b>         | <b>max.n.genes</b> | <b>n.iter</b> |
|----------------------|--------------------|---------------|
| model 1 <sup>a</sup> | 100                | 35            |
| model 2 <sup>b</sup> | 90                 | 20            |
| model 3 <sup>c</sup> | 95                 | 35            |
| model 4 <sup>d</sup> | 95                 | 10            |

<sup>a</sup>model 1: the Cox model and RNA-Seq data;

<sup>b</sup>model 2: the Cox model and clinically-integrated RNA-Seq data;

<sup>c</sup>model 3: the RSF model and RNA-Seq data;

<sup>d</sup>model 4: the RSF model and clinically-integrated RNA-Seq data.



**Table S7: Cox survival analysis of the GSE72094 cohort**

| Factor                        | Univariate                             |          | Multivariable          |          |
|-------------------------------|----------------------------------------|----------|------------------------|----------|
|                               | HR <sup>a</sup> (95% CI <sup>b</sup> ) | <i>p</i> | HR(95% CI)             | <i>p</i> |
| age(>70 <sup>c</sup> vs <=70) | 1.12<br>(0.77 to 1.62)                 | 0.56     | 1.07<br>(0.73 to 1.56) | 0.75     |
| gender(female vs male)        | 0.65<br>(0.45 to 0.94)                 | 0.026    | 0.54<br>(0.33 to 0.89) | 0.02     |
| stage                         | 1.62<br>(1.36 to 1.94)                 | 8.88e-08 | 1.73<br>(1.36 to 2.19) | 5.61e-06 |
| risk score (high vs low)      | 2.12<br>(1.44 to 3.12)                 | 1.47e-04 | 0.91<br>(0.50 to 1.64) | 0.75     |

<sup>a</sup>HR = hazard ratio;

<sup>b</sup>CI = confidence interval;

<sup>c</sup>70 = median age of patients with LUAD in the GSE72094 cohort.

**Table S8: Cox survival analysis of the GSE11969 cohort**

| Factor                           | Univariate                             |          | Multivariable          |          |
|----------------------------------|----------------------------------------|----------|------------------------|----------|
|                                  | HR <sup>a</sup> (95% CI <sup>b</sup> ) | <i>p</i> | HR(95% CI)             | <i>p</i> |
| age(>63 <sup>c</sup> vs<br><=63) | 1.61<br>(1.02 to 2.54)                 | 0.04     | 1.73<br>(1.08 to 2.76) | 0.02     |
| gender(female vs<br>male)        | 0.70<br>(0.43 to 1.17)                 | 0.18     | 0.77<br>(0.45 to 1.31) | 0.33     |
| stage                            | 1.99<br>(1.54 to 2.58)                 | 1.86e-07 | 1.72<br>(1.05 to 2.80) | 0.03     |
| risk score<br>(high vs low)      | 3.37<br>(2.06 to 5.49)                 | 1.18e-06 | 1.48<br>(0.59 to 3.74) | 0.40     |

<sup>a</sup>HR = hazard ratio;

<sup>b</sup>CI = confidence interval;

<sup>c</sup>63 = median age of patients with LUAD in the GSE11969 cohort.

**Table S9: Survival analysis based on the GSE11969 cohort**

| <b>model</b>         | <b>HR<sup>a</sup> (95% CI<sup>b</sup>)</b> | <b>p</b> | <b>C-index<sup>c</sup></b> |
|----------------------|--------------------------------------------|----------|----------------------------|
| model 1 <sup>d</sup> | 1.89 (1.19-3.00)                           | 7.49e-03 | 0.590                      |
| model 2 <sup>e</sup> | 3.60 (2.18-5.94)                           | 5.69e-07 | 0.660                      |
| model 3 <sup>f</sup> | 1.89 (1.18-3.02)                           | 8.39e-03 | 0.590                      |
| model 4 <sup>g</sup> | 3.87 (2.27-6.61)                           | 6.81e-07 | 0.670                      |

<sup>a</sup>HR = hazard ratio;

<sup>b</sup>CI = confidence interval;

<sup>c</sup>C-index = concordance index;

<sup>d</sup>model 1: the Cox model and RNA-Seq data;

<sup>e</sup>model 2: the Cox model and clinically-integrated RNA-Seq data;

<sup>f</sup>model 3: the RSF model and RNA-Seq data;

<sup>g</sup>model 4: the RSF model and clinically-integrated RNA-Seq data.
